# Supplementary material
Source: Springer Nature journal article supplement (https://www.springermedizin.de/resource/supplementary/13075_2012_3804_MOESM5_ESM.pdf/9695404)

**Non-  
Puncture**

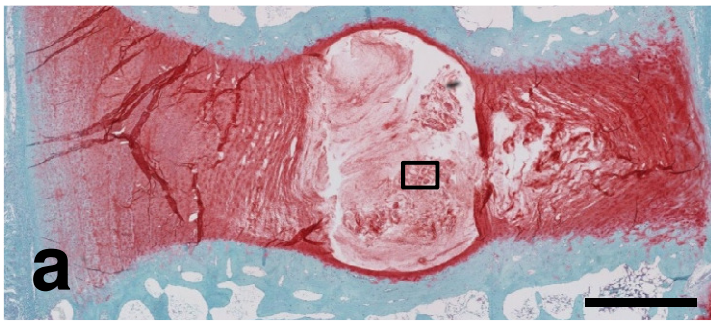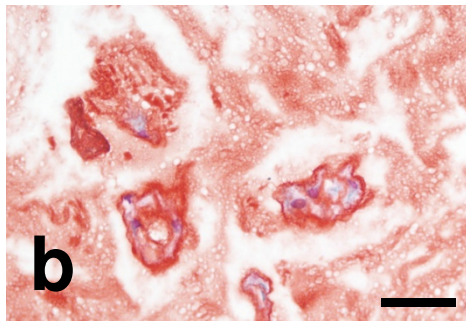

**PBS**

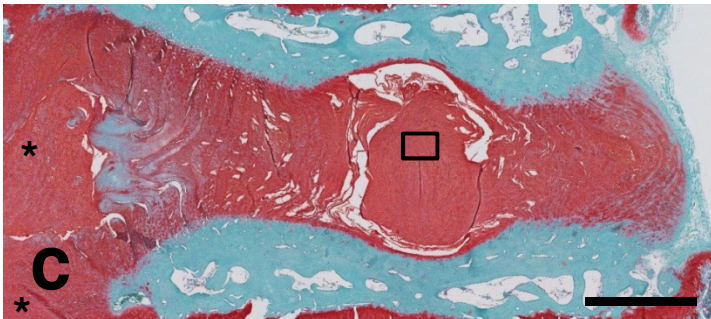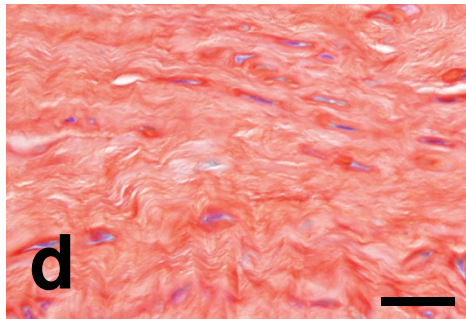

**PPP**

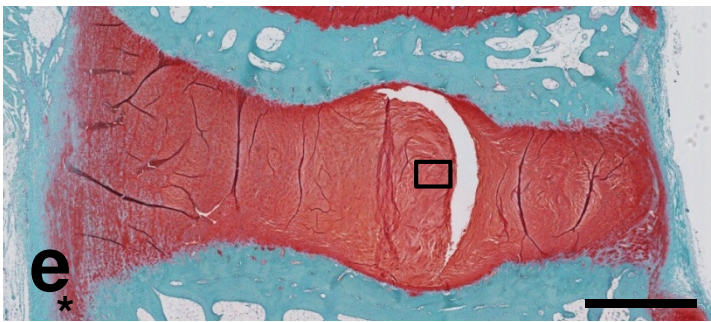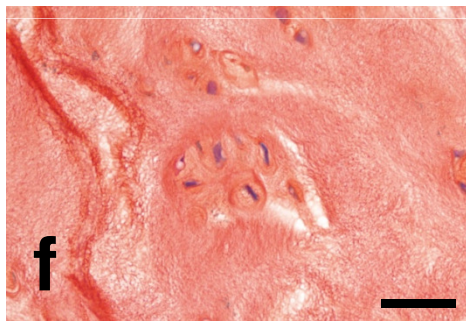

**PRP**

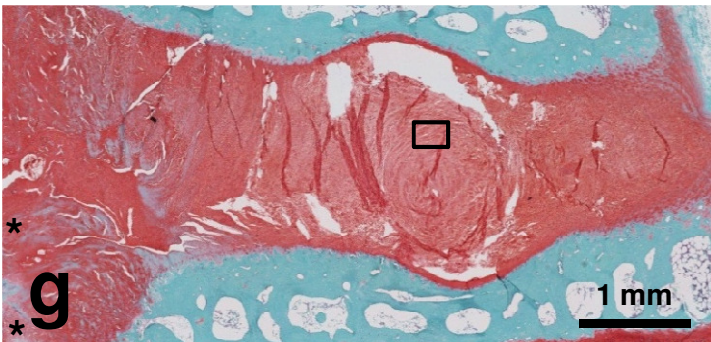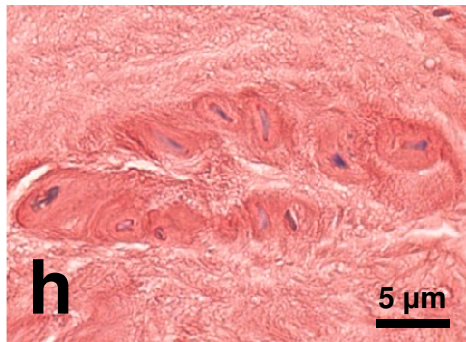

Supplement: MOESM5 [file 9695404]
